# Supplementary material for: Physical exercise and major depressive disorder in adults: systematic review and meta-analysis
Source: Springer Nature journal article supplement (doi:10.1038/s41598-023-39783-2), 2023-08-14
Supplement: MOESM1 [file 41598_2023_39783_MOESM1_ESM.pdf]

*PHYSICAL EXERCISE AND MAJOR DEPRESSIVE DISORDER IN ADULTS: SYSTEMATIC REVIEW AND  
META-ANALYSIS.*

PhD. Édison Andrés Pérez Bedoya. Department of Physical Education of the Federal University of Viçosa, Minas Gerais, Brazil. Email: [edison.bedoya@ufv.br](mailto:edison.bedoya@ufv.br). ORCID: [0000-0002-1929-9132](https://orcid.org/0000-0002-1929-9132)

MSc. Luisa Fernanda Puerta López. Department of Physical Education of the Antioquia University, Medellín, Colombia. Email: [luisa.puertal@udea.edu.co](mailto:luisa.puertal@udea.edu.co) ORCID: [0000-0001-6177-1456](https://orcid.org/0000-0001-6177-1456)

BSc. Daniel Alejandro López Galvis. Department of Physical Education of the Antioquia University, Medellín, Colombia. Email: [daniel.lopez12@udea.edu.co](mailto:daniel.lopez12@udea.edu.co) ORCID: [0000-0003-1164-0639](https://orcid.org/0000-0003-1164-0639)

PhD. Diego Alejandro Rojas Jaimes. Department of Physical Education of Llanos University, Villavicencio, Colombia. Email: [diego.rojas.jaimes@unillanos.edu.co](mailto:diego.rojas.jaimes@unillanos.edu.co) ORCID: [0000-0002-4133-1653](https://orcid.org/0000-0002-4133-1653)

PhD. Osvaldo Costa Moreira. Department of Physical Education of the Federal University of Viçosa, Minas Gerais, Brazil. Email: [osvaldo.moreira@ufv.br](mailto:osvaldo.moreira@ufv.br) ORCID: [0000-0002-1386-8883](https://orcid.org/0000-0002-1386-8883)

**Contact information for the corresponding author.**

Édison Andrés Pérez Bedoya. Department of Physical Education of the Federal University of Viçosa, Minas Gerais, Brazil. Visiting address: Av. Peter Henry Rolfs, s/n - Campus Universitário, Viçosa - MG, 36570-900 Tel: (+55) 31 972573537. Email: [edison.bedova@ufv.br](mailto:edison.bedova@ufv.br)

## SEARCH STRATEGY

### MEDLINE (via OVID)

Hits: **307**

No restriction on timeline

Medline was searched with appropriate Medical Subject Headings (MeSH). A filter was established: randomized controlled trials.

|    |                                         |        |
|----|-----------------------------------------|--------|
| 1  | exp " Depressive Disorder, Major "/     | 38298  |
| 2  | Depression, Involutional/               | 38298  |
| 3  | Major Depressive Disorder Melancholia/  | 0      |
| 4  | Involutional Paraphrenia/               | 38298  |
| 5  | Involutional Psychosis/                 | 38298  |
| 6  | Involutional/                           | 0      |
| 7  | 1 or 2 or 3 or 4 or 5 or 6              | 38298  |
| 8  | exp " Resistance Training "/            | 12229  |
| 9  | Training, Resistance/                   | 12229  |
| 10 | Strength Training/                      | 12229  |
| 11 | Training, Strength/                     | 12229  |
| 12 | Weight-Lifting Strengthening Program/   | 12229  |
| 13 | Strengthening Program, Weight-Lifting/  | 12229  |
| 14 | Strengthening Programs, Weight-Lifting/ | 12229  |
| 15 | Weight Lifting Strengthening Program/   | 12229  |
| 16 | Weight-Lifting Strengthening Programs/  | 12229  |
| 17 | Weight-Lifting Exercise Program/        | 12229  |
| 18 | Exercise Program, Weight-Lifting/       | 12229  |
| 19 | Exercise Programs, Weight-Lifting/      | 12229  |
| 20 | Weight Lifting Exercise Program/        | 12229  |
| 21 | Weight-Lifting Exercise Programs/       | 12229  |
| 22 | Weight-Bearing Strengthening Program/   | 12229  |
| 23 | Strengthening Program, Weight-Bearing/  | 12229  |
| 24 | Strengthening Programs, Weight-Bearing/ | 12229  |
| 25 | Weight Bearing Strengthening Program/   | 12229  |
| 26 | Weight-Bearing Strengthening Programs/  | 12229  |
| 27 | Weight-Bearing Exercise Program/        | 12229  |
| 28 | Exercise Program, Weight-Bearing/       | 12229  |
| 29 | Exercise Programs, Weight-Bearing/      | 12229  |
| 30 | Weight Bearing Exercise Program/        | 12229  |
| 31 | Weight-Bearing Exercise Programs/       | 12229  |
| 32 | exp "Exercise"/                         | 245608 |
| 33 | Acute Exercise/                         | 141099 |
| 34 | Aerobic Exercise/                       | 141099 |

|    |                                                                                                                                                                                      |            |
|----|--------------------------------------------------------------------------------------------------------------------------------------------------------------------------------------|------------|
| 35 | Exercise Training/                                                                                                                                                                   | 141099     |
| 36 | Exercise, Aerobic/                                                                                                                                                                   | 141099     |
| 37 | Exercise, Physical/                                                                                                                                                                  | 141099     |
| 38 | 8 or 9 or 10 or 11 or 12 or 13 or 14 or 15 or 16 or 17 or 18 or 19 or 20 or 21 or 22 or 22 or 23 or 24 or 25 or 26 or 27 or 28 or 29 or 30 or 31 or 32 or 33 or 34 or 35 or 36 or 37 | 245608     |
| 39 | 7 and 38                                                                                                                                                                             | <b>307</b> |

## *CENTRAL*

*Hits: 765*

No restriction on timeline

CENTRAL was searched with appropriate Medical Subject Headings (MeSH). A filter was established: randomized controlled trials.

| ID  | Search                                 | Hits  |
|-----|----------------------------------------|-------|
| #1  | Depressive Disorder, Major             | 15882 |
| #2  | Depression, Involutional               | 53    |
| #3  | Major Depressive Disorder Melancholia  | 128   |
| #4  | Involutional Paraphrenia               | 2     |
| #5  | Involutional Psychosis                 | 11    |
| #6  | Involutional                           | 167   |
| #7  | #1 OR #2 OR #3 OR #4 OR #5 OR #6       | 16023 |
| #8  | Resistance Training                    | 17212 |
| #9  | Training, Resistance                   | 17212 |
| #10 | Strength Training                      | 20998 |
| #11 | Training, Strength                     | 20998 |
| #12 | Weight-Lifting Strengthening Program   | 43    |
| #13 | Strengthening Program, Weight-Lifting  | 43    |
| #14 | Strengthening Programs, Weight-Lifting | 28    |
| #15 | Weight Lifting Strengthening Program   | 81    |
| #16 | Weight-Lifting Strengthening Programs  | 28    |
| #17 | Weight-Lifting Exercise Program        | 349   |
| #18 | Exercise Program, Weight-Lifting       | 349   |
| #19 | Exercise Programs, Weight-Lifting      | 135   |
| #20 | Weight Lifting Exercise Program        | 450   |
| #21 | Weight-Lifting Exercise Programs       | 135   |
| #22 | Weight-Bearing Strengthening Program   | 157   |
| #23 | Strengthening Program, Weight-Bearing  | 157   |
| #24 | Strengthening Programs, Weight-Bearing | 81    |

|     |                                                                                                                                                                                                                            |            |
|-----|----------------------------------------------------------------------------------------------------------------------------------------------------------------------------------------------------------------------------|------------|
| #25 | Weight Bearing Strengthening Program                                                                                                                                                                                       | 168        |
| #26 | Weight-Bearing Strengthening Programs                                                                                                                                                                                      | 81         |
| #27 | Weight-Bearing Exercise Program                                                                                                                                                                                            | 557        |
| #28 | Exercise Program, Weight-Bearing                                                                                                                                                                                           | 557        |
| #29 | Exercise Programs, Weight-Bearing                                                                                                                                                                                          | 180        |
| #30 | Weight Bearing Exercise Program                                                                                                                                                                                            | 604        |
| #31 | Weight-Bearing Exercise Programs                                                                                                                                                                                           | 180        |
| #32 | Exercise                                                                                                                                                                                                                   | 127500     |
| #33 | Acute Exercise                                                                                                                                                                                                             | 12622      |
| #34 | Aerobic Exercise                                                                                                                                                                                                           | 17187      |
| #35 | Exercise Training                                                                                                                                                                                                          | 44613      |
| #36 | Exercise, Aerobic                                                                                                                                                                                                          | 17187      |
| #37 | Exercise, Physical                                                                                                                                                                                                         | 57123      |
| #38 | #8 OR #9 OR #10 OR #11 OR #12 OR #13 OR #14 OR #15 OR #16 OR #17 OR #18 OR #19 OR #20 OR #21 OR #22 OR #22 OR #23 OR #24 OR #25 OR #26 OR #27 OR #28 OR #29 OR #30 OR #31 OR #32 OR #33 OR #34 OR #35 OR #36 OR #37 135999 |            |
| #39 | #7 AND #38                                                                                                                                                                                                                 | <b>765</b> |

#### Embase

Hits: **1,186**

No restriction on timeline

Embase was searched with appropriate Medical Subject Headings (MeSH). A filter was established: randomized controlled trials.

| No.  | Query Results                                                                                                                                                                                         | Results      |
|------|-------------------------------------------------------------------------------------------------------------------------------------------------------------------------------------------------------|--------------|
| #38. | #7 AND #37                                                                                                                                                                                            | <b>1,186</b> |
| #37. | #8 OR #9 OR #10 OR #11 OR #12 OR #13 OR #14 OR #15 OR #16 OR #17 OR #18 OR #19 OR #20 OR #21 OR #22 OR #23 OR #24 OR #25 OR #26 OR #27 OR #28 OR #29 OR #30 OR #31 OR #32 OR #33 OR #34 OR #35 OR #36 | 438,192      |
| #36. | 'exercise, physical'                                                                                                                                                                                  | 1,114        |
| #35. | 'exercise, aerobic'/de                                                                                                                                                                                | 22,500       |
| #34. | 'exercise training'/de                                                                                                                                                                                | 351,342      |
| #33. | 'aerobic exercise'/de                                                                                                                                                                                 | 22,500       |
| #32. | 'acute exercise'/de                                                                                                                                                                                   | 22           |
| #31. | 'exercise'/exp                                                                                                                                                                                        | 437,805      |

|                                               |        |  |
|-----------------------------------------------|--------|--|
| #30. 'weight-bearing exercise programs'       | 4      |  |
| #29. 'weight bearing exercise program'        | 28     |  |
| #28. 'exercise programs, weight-bearing'      | 3      |  |
| #27. 'exercise program, weight-bearing'       | 3      |  |
| #26. 'weight-bearing exercise program'        | 28     |  |
| #25. 'weight-bearing strengthening programs'  | 1      |  |
| #24. 'weight bearing strengthening program'   | 4      |  |
| #23. 'strengthening programs, weight-bearing' | 2      |  |
| #22. 'strengthening program, weight-bearing'  | 2      |  |
| #21. 'weight-bearing strengthening program'   | 4      |  |
| #20. 'weight-lifting exercise programs'       | 1      |  |
| #19. 'weight lifting exercise program'        | 2      |  |
| #18. 'exercise programs, weight-lifting'      | 2      |  |
| #17. 'exercise program, weight-lifting'       | 1      |  |
| #16. 'weight-lifting exercise program'        | 2      |  |
| #15. 'weight-lifting strengthening programs'  | 2      |  |
| #14. 'weight lifting strengthening program'   | 1      |  |
| #13. 'strengthening programs, weight-lifting' | 1      |  |
| #12. 'strengthening program, weight-lifting'  | 1      |  |
| #11. 'weight-lifting strengthening program'   | 1      |  |
| #10. 'training, strength'                     | 219    |  |
| #9. 'training, resistance'                    | 217    |  |
| #8. 'resistance training'/exp                 | 27,047 |  |
| #7. #1 OR #2 OR #3 OR #4 OR #5 OR #6          | 84,170 |  |
| #6. involutional                              | 2,458  |  |
| #5. 'involutional psychosis'/de               | 15     |  |
| #4. 'involutional paraphrenia'                | 15     |  |
| #3. 'major depressive disorder melancholia'   | 15     |  |
| #2. 'depression, involutional'/de             | 338    |  |
| #1. 'depressive disorder, major'/exp          | 82,071 |  |

**Results: 34**

## *Clinical Trials*

**Hits: 14**

No restriction on timeline

Clinical trials were searched with appropriate Medical Subject Headings (MeSH). A filter was established: randomized controlled trials.

|                                |                                                                  |
|--------------------------------|------------------------------------------------------------------|
| <b>Other terms:</b>            | randomized                                                       |
| <b>Study type:</b>             | Interventional Studies (Clinical Trials)                         |
| <b>Study Results:</b>          | All Studies                                                      |
| <b>Intervention/treatment:</b> | resistance training OR strength training AND Exercise OR Aerobic |
| <b>Outcome Measure:</b>        | Exercise                                                         |
| <b>Outcome Measure:</b>        | Depressive Disorder, Major                                       |

[https://clinicaltrials.gov/ct2/results?cond=Depressive+Disorder%2C+Major&term=randomized&type=Interventional&age\\_v=&gndr=&intr=resistance+training+OR+strength+training+AND+Exercise+OR+Aerobic+Exercise&titles=&outc=&spons=&lead=&id=&cntry=&state=&city=&dist=&locn=&rsub=&strd\\_s=&strd\\_e=&prcd\\_s=&prcd\\_e=&sfpd\\_s=&sfpd\\_e=&rfpd\\_s=&rfpd\\_e=&lupd\\_s=&lupd\\_e=&sort=](https://clinicaltrials.gov/ct2/results?cond=Depressive+Disorder%2C+Major&term=randomized&type=Interventional&age_v=&gndr=&intr=resistance+training+OR+strength+training+AND+Exercise+OR+Aerobic+Exercise&titles=&outc=&spons=&lead=&id=&cntry=&state=&city=&dist=&locn=&rsub=&strd_s=&strd_e=&prcd_s=&prcd_e=&sfpd_s=&sfpd_e=&rfpd_s=&rfpd_e=&lupd_s=&lupd_e=&sort=)

**Table S1** *Studies excluded and reason for exclusion*

| <b>Excluded studies with their respective reason</b> |                                                                                                                                                                  |
|------------------------------------------------------|------------------------------------------------------------------------------------------------------------------------------------------------------------------|
| <b>Study</b>                                         | <b>Reason for exclusion</b>                                                                                                                                      |
| <b>Brüchle, 2021<br/>Germany</b>                     | Interventions based on physical activity programs.                                                                                                               |
| <b>Moncrieft, 2016<br/>USA</b>                       | The study was conducted with diabetic individuals with depressive symptoms.<br>They did not have a diagnosis of Major Depressive Disorder.                       |
| <b>Moraes, 2019<br/>Brazil</b>                       | The study comparison was aerobic exercise and low-intensity resistance exercise.                                                                                 |
| <b>Pilu, 2007<br/>Italy</b>                          | This was a case-control study. They also carried out interventions based on physical activity programs.                                                          |
| <b>Wa Chaua, 2020<br/>Hong Kong</b>                  | Several of the participants in both the intervention and control groups were prescribed psychiatric medications.                                                 |
| <b>Knubben, 2007<br/>Alemania</b>                    | The population did not have a diagnosis of major depression.                                                                                                     |
| <b>Foley, 2008<br/>New Zealand</b>                   | Included adults taking antidepressant medications.                                                                                                               |
| <b>Haboush, 2006<br/>USA</b>                         | This is a pilot study that conducted interventions with depressed older adults.<br>However, they do not report whether they had a diagnosis of major depression. |
| <b>Salehi, 2016<br/>Iran</b>                         | The comparator in this study is electroconvulsive therapy.                                                                                                       |
| <b>Kerling, 2015<br/>Germany</b>                     | Some of the individuals received regular therapy during the exercise interventions.                                                                              |
| <b>Legrand, 2016<br/>France</b>                      | During the interventions, the people were taking antidepressants.                                                                                                |
| <b>Abdelbasset, 2021<br/>Saudi Arabia</b>            | The population did not have a diagnosis of major depression.                                                                                                     |
| <b>Zahra, 2016<br/>Iran</b>                          | Drug interventions                                                                                                                                               |
| <b>Akandere, 2011<br/>Turkey</b>                     | The population did not have a diagnosis of major depression.                                                                                                     |
| <b>Ansai, 2016<br/>Brazil</b>                        | The population did not have a diagnosis of major depression.                                                                                                     |
| <b>Moreira, 2005<br/>Brazil</b>                      | The population did not have a diagnosis of major depression.                                                                                                     |
| <b>Bernard, 2015<br/>France</b>                      | Patients with Dysthymia                                                                                                                                          |
| <b>Netz, 2017<br/>Israel</b>                         | Literature review                                                                                                                                                |



|                                               |                                                                                                                                                           |
|-----------------------------------------------|-----------------------------------------------------------------------------------------------------------------------------------------------------------|
| <b>Zhang, 2022</b><br><b>China</b>            | A cross-sectional                                                                                                                                         |
| <b>Conradsson, 2010</b><br><b>Sweden</b>      | The population did not have a diagnosis of major depression.                                                                                              |
| <b>Damush, 1999</b><br><b>USA</b>             | The population did not have a diagnosis of major depression.                                                                                              |
| <b>Geliebter, 1997</b><br><b>USA</b>          | The population did not have a diagnosis of major depression.                                                                                              |
| <b>Isaksen, 2016</b><br><b>Norway</b>         | The population did not have a diagnosis of major depression.                                                                                              |
| <b>Jagger, 2015</b><br><b>UK</b>              | The population did not have a diagnosis of major depression.                                                                                              |
| <b>Kekäläinen, 2018</b><br><b>Finland</b>     | The population did not have a diagnosis of major depression.                                                                                              |
| <b>Kerse, 2010</b><br><b>Australia</b>        | The population did not have a diagnosis of major depression.                                                                                              |
| <b>Legrand, 2007</b><br><b>France</b>         | Aerobic exercise as a comparator                                                                                                                          |
| <b>Mendham, 2021</b><br><b>South Africa.</b>  | The population did not have a diagnosis of major depression.                                                                                              |
| <b>Naumann, 2020</b><br><b>Germany</b>        | Outpatients with moderate depression                                                                                                                      |
| <b>Neidig, 2003</b><br><b>USA</b>             | The population did not have a diagnosis of major depression.                                                                                              |
| <b>Ng, 2017</b><br><b>Malaysia</b>            | Cancer patients without a diagnosis of major depression.                                                                                                  |
| <b>Norvell, 1993</b><br><b>USA</b>            | The population did not have a diagnosis of major depression.                                                                                              |
| <b>Palmer, 1995</b><br><b>USA</b>             | The population did not have a diagnosis of major depression.                                                                                              |
| <b>Payne, 2008</b><br><b>USA</b>              | The population did not have a diagnosis of major depression.                                                                                              |
| <b>Perna, 2010</b><br><b>USA</b>              | Cancer patients without a diagnosis of major depression.                                                                                                  |
| <b>Puterman, 2021</b><br><b>Canada</b>        | The population did not have a diagnosis of major depression.                                                                                              |
| <b>Tapps, 2013</b><br><b>USA</b>              | Interventions based on physical activity programs.                                                                                                        |
| <b>Vanková, 2014</b><br><b>Czech Republic</b> | The population did not have a diagnosis of major depression.                                                                                              |
| <b>Schuch, 2011</b><br><b>Brazil</b>          | The study does not present the components of the FITTVP. Also, the intervention was accompanied by pharmacological therapy.                               |
| <b>Krogh, 2009</b><br><b>Denmark</b>          | The population suffered from unipolar depression whose classification was based on the International Classification of Diseases, Tenth Revision (ICD-10). |
| <b>Singh, 2005</b><br><b>Australia</b>        | Intervened with people diagnosed with depressive disorders (MDD, Dysthymia and minor depression).                                                         |

|                                          |                                                                                                                                                         |
|------------------------------------------|---------------------------------------------------------------------------------------------------------------------------------------------------------|
| <b>Hoffman, 2011<br/>USA</b>             | Participants were observed for one year after the interventions and reported antidepressant medication use.                                             |
| <b>Sims, 2006<br/>Australia</b>          | The participants did not have a diagnosis of major depressive disorder. This study evaluated depressive symptomatology in older adults.                 |
| <b>Mota-Pereira, 2011<br/>Portugal</b>   | They compared aerobic exercise and medication with medication alone.                                                                                    |
| <b>Martinsen, 1985<br/>Norway</b>        | They compared aerobic exercise and medication with medication alone.                                                                                    |
| <b>Schuch, 2015<br/>Brazil</b>           | They compared aerobic exercise and medication with medication alone.                                                                                    |
| <b>Rueter, 1980<br/>USA</b>              | They compared aerobic exercise and therapy with therapy.                                                                                                |
| <b>Veale, 1992<br/>UK</b>                | Participants received the usual therapy (psychological and pharmacological) during the interventions.                                                   |
| <b>Oertel-Kno"chel, 2014<br/>Germany</b> | They included adults with MDD and schizophrenia who were taking medication for those illnesses.                                                         |
| <b>Babyak, 2000<br/>USA</b>              | The results of the study during the interventions were published by Blumenthal, 1999. This is the same intervention but published in different studies. |

**Fig. S1** *Risk of bias of individual studies*

Summary of risk of bias of studies

| Intention-to-treat | Unique ID | Study ID        | Experimental        | Comparator               | Outcome             | Weight | D1 | D2 | D3 | D4 | D5 | Overall |                                               |
|--------------------|-----------|-----------------|---------------------|--------------------------|---------------------|--------|----|----|----|----|----|---------|-----------------------------------------------|
|                    | 1         | Blumenthal 1999 | Aerobic Exercise    | Medication               | Depressive symptoms | NA     | +  | !  | +  | +  | !  | +       | Low risk                                      |
|                    | 2         | Blumenthal 2007 | Aerobic Exercise    | Medication               | Depressive symptoms | NA     | +  | +  | +  | +  | +  | +       | Some concerns                                 |
|                    | 3         | Dunn 2005       | Aerobic Exercise    | Placebo                  | Depressive symptoms | NA     | +  | !  | +  | +  | !  | +       | High risk                                     |
|                    | 4         | Herman 2002     | Aerobic Exercise    | Medication               | Depressive symptoms | NA     | +  | +  | +  | +  | !  | +       |                                               |
|                    | 5         | Khatri 2001     | Aerobic Exercise    | Medication               | Depressive symptoms | NA     | +  | !  | +  | !  | !  | +       | D1 Randomisation process                      |
|                    | 6         | Krogh 2012      | Aerobic Exercise    | Stretching Exercise      | Depressive symptoms | NA     | +  | !  | +  | +  | +  | !       | D2 Deviations from the intended interventions |
|                    | 7         | Krogh 2014      | Aerobic Exercise    | Stretching Exercise      | Depressive symptoms | NA     | +  | !  | +  | +  | +  | !       | D3 Missing outcome data                       |
|                    | 8         | Sadeghi 2016    | Aerobic Exercise    | Cognitive Behavior       | Depressive symptoms | NA     | +  | +  | +  | +  | !  | +       | D4 Measurement of the outcome                 |
|                    | 9         | Singh 1996      | Resistance Exercise | Health Education Program | Depressive symptoms | NA     | !  | !  | +  | +  | !  | +       | D5 Selection of the reported result           |

**Fig. S1** Risk of bias II graph: review authors' judgments about each risk of bias item presented as all included studies

**Table S2** *Report of exercise interventions in physical exercise programs*

| <b>Report on the completeness of physical exercise interventions in the different modalities: resistance exercise and aerobic exercise</b> |                            |                                         |                                       |
|--------------------------------------------------------------------------------------------------------------------------------------------|----------------------------|-----------------------------------------|---------------------------------------|
| <b>CERT Ítem</b>                                                                                                                           | <b>Total interventions</b> | <b>Resistance exercise (n= 1) n (%)</b> | <b>Aerobic exercise (n= 12) n (%)</b> |
|                                                                                                                                            | <b>(n= 13) n (%)</b>       |                                         |                                       |
| <b>1. What (materials)</b>                                                                                                                 | 12 (92.30%)                | 1 (100%)                                | 11 (91.66%)                           |
| <b>2. Who (Provider)</b>                                                                                                                   | 5 (38.46%)                 | 1 (100%)                                | 4 (33.33%)                            |
| <b>3. Individual or group</b>                                                                                                              | 9 (69.23%)                 | 0 (0%)                                  | 9 (75.00%)                            |
| <b>4. Supervised or unsupervised</b>                                                                                                       | 13 (100%)                  | 1 (100%)                                | 12 (100%)                             |
| <b>5. Adherence report</b>                                                                                                                 | 8 (61.53%)                 | 0 (0%)                                  | 8 (66.66%)                            |
| <b>6. Motivation strategies</b>                                                                                                            | 0 (0%)                     | 0 (0%)                                  | 0 (0%)                                |
| <b>7a. Exercise progression</b>                                                                                                            | 5 (38.46%)                 | 1 (100%)                                | 4 (33.33%)                            |
| <b>7b. Program progression</b>                                                                                                             | 4 (30.76%)                 | 1 (100%)                                | 3 (25.00%)                            |
| <b>8. Replication of the exercise</b>                                                                                                      | 13 (100%)                  | 1 (100%)                                | 12 (100%)                             |
| <b>9. Home component</b>                                                                                                                   | 2 (15.38%)                 | 0 (0%)                                  | 2 (16.66%)                            |
| <b>10. Non-exercise components</b>                                                                                                         | 2 (15.38%)                 | 1 (100%)                                | 1 (8.33%)                             |
| <b>11. Adverse Event Reporting</b>                                                                                                         | 9 (69.23%)                 | 1 (100%)                                | 8 (66.66%)                            |
| <b>12. Environment</b>                                                                                                                     | 5 (38.46%)                 | 0 (0%)                                  | 5 (41.66%)                            |
| <b>13. Exercise description</b>                                                                                                            | 13 (100%)                  | 1 (100%)                                | 12 (100%)                             |
| <b>14a. Generic or personalized exercises</b>                                                                                              | 13 (100%)                  | 1 (100%)                                | 12 (100%)                             |

|                                                        |            |          |            |
|--------------------------------------------------------|------------|----------|------------|
| <b>14b. Adaptation of exercise to individuals</b>      | 13 (100%)  | 1 (100%) | 12 (100%)  |
| <b>15. Rules for the initial level</b>                 | 13 (100%)  | 1 (100%) | 12 (100%)  |
| <b>16a. Adherence measurement</b>                      | 8 (61.53%) | 0 (0%)   | 8 (66.66%) |
| <b>16b. ¿Does the intervention match the planning?</b> | 13 (100%)  | 1 (100%) | 12 (100%)  |

---

CERT: The Consensus on Exercise Reporting Template tool.

**Table S3** *Adverse events by degree of severity described for those in the aerobic exercise and controls*

| <b>AEs Degrees</b>   | <b>Aerobic exercise (includes supervised aerobic exercise and unsupervised home aerobic exercise)<br/>[25 adverse events, 375 participants]<br/>(Total de AEs<sup>a</sup> - exercise-related AEs)</b>           | <b>Controls: treatment recommended by ACP (second-generation antidepressants or cognitive behavioral therapy), mind-body exercise, yoga, or tai-chi and no exercise interventions.<br/>[39 adverse events, 308 participants]<br/>(Total AEs<sup>a</sup> - AEs related to usual care)</b> |
|----------------------|-----------------------------------------------------------------------------------------------------------------------------------------------------------------------------------------------------------------|------------------------------------------------------------------------------------------------------------------------------------------------------------------------------------------------------------------------------------------------------------------------------------------|
| <b>1</b>             | Grade 1 adverse events: (5 - 5)<br>Muscle event (3-3)<br>Other painful manifestations-<br>Chest pain (1-1)<br>Other painful manifestations-<br>Muscle/joint pain (1-1)                                          | Grade 1 adverse events: Null                                                                                                                                                                                                                                                             |
| <b>2</b>             | Grade 2 adverse events: (10 - 0)<br>Mood disturbances-Worsening MDD (6-0*)<br>Mood disturbances-Antidepressants under follow-up (4-0*)                                                                          | Grade 2 adverse events: (14 - 1)<br>Mood disturbances-Worsening MDD (6-1*)<br>Mood disturbances-Antidepressants in follow-up (8-0*)                                                                                                                                                      |
| <b>3<sup>b</sup></b> | Grade 3 adverse events: (9 - 1)<br>Unspecified medical reasons (3-0*)<br>Medical contraindication (1-1)<br>Mood disturbances-Psychiatric emergencies (3-0*)<br>Mood disturbances-Admission to psychiatry (2-0*) | Grade 3 adverse events: (25 - 21)<br>Medication AE-Dizziness, drowsiness, agitation, diarrhea (19-19)<br>New Medical Condition (2-2)<br>Mood disorders-Psychiatric emergencies (2-0*)<br>Mood disturbances-Admission to psychiatry (2-0*)                                                |
| <b>4</b>             | Grade 4 adverse events: (1 - 0*)<br>Mood disturbances-Suicidal ideation (1-0*)                                                                                                                                  | Grade 4 adverse events: Null                                                                                                                                                                                                                                                             |
| <b>5</b>             | Grade 5 adverse events: Null                                                                                                                                                                                    | Grade 5 adverse events: Null                                                                                                                                                                                                                                                             |

AEs: Adverse Event; ACP: American College of Physicians; \* =not related to the intervention

The AEs were classified according to the Common Terminology Criteria: grade 1) mild or asymptomatic symptoms; grade 2) indicated moderate, minimal, local or non-invasive intervention and limitation of age-appropriate activities of daily living; grade 3) seriously or medically significant but not immediately life-threatening; grade 4) life-threatening consequences and indicated urgent intervention, or; Grade 5) Death

<sup>a</sup> Includes all AEs (both exercise-related and non-exercise-related)

<sup>b</sup> The AEs in those who were not reported to be grade 3.

**Table S4** *Subgroup analysis*

| Summary of results based on subgroups with one or more studies. |                                  |         |        |     |                                                     |                            |          |                      |
|-----------------------------------------------------------------|----------------------------------|---------|--------|-----|-----------------------------------------------------|----------------------------|----------|----------------------|
| Outcomes                                                        | Subgroups                        | Studies | Sample |     | Std. Mean<br>Difference<br>IV,<br>Random,<br>95% CI | Subgroup<br>I <sup>2</sup> | P        | Total I <sup>2</sup> |
|                                                                 |                                  |         | IG     | CG  |                                                     |                            |          |                      |
| Depressive symptoms                                             |                                  |         |        |     |                                                     |                            |          |                      |
|                                                                 | Exercise modalities              | 7       | 428    | 386 | -0.27 [-0.58, 0.04]                                 |                            | P = 0.09 | 76%                  |
|                                                                 | Aerobic Exercise                 | 6       | 413    | 373 | -0.26 [-0.59, 0.07]                                 | 78%                        | P = 0.12 | 76%                  |
|                                                                 | Resistance Exercise              | 1       | 15     | 13  | -0.43 [-1.18, 0.32]                                 | Not applicable             | P = 0.26 | 76%                  |
|                                                                 | Symptom assessment instrument    | 7       | 428    | 386 | -0.27 [-0.58, 0.04]                                 |                            | P = 0.09 | 76%                  |
|                                                                 | Hamilton Depression Rating Scale | 4       | 265    | 235 | -0.46 [-0.94, 0.01]                                 | 83%                        | P = 0.06 | 76%                  |
|                                                                 | Beck Depression Inventory        | 4       | 163    | 151 | -0.02 [-0.31, 0.28]                                 | 41%                        | P = 0.92 | 76%                  |
|                                                                 | Body composition                 | 4       | 238    | 206 | -0.55 [-1.06, -0.04]                                |                            | P = 0.03 | 82%                  |
|                                                                 | Overweight adults                | 2       | 71     | 72  | -0.05 [-0.55, 0.45]                                 | 40%                        | P = 0.84 | 82%                  |
|                                                                 | Obese adults                     | 1       | 104    | 98  | -0.08 [-0.36, 0.20]                                 | 0%                         | P = 0.57 | 82%                  |
|                                                                 | Overweight and obese adults      | 1       | 63     | 36  | -1.27 [-2.65, 0.12]                                 | 88%                        | P = 0.07 | 82%                  |
|                                                                 | Age comparison                   | 7       | 428    | 386 | -0.27 [-0.58, 0.04]                                 |                            | P = 0.09 | 76%                  |
|                                                                 | Under 50 years old               | 2       | 119    | 95  | -0.94 [-2.02, 0.13]                                 | 90%                        | P = 0.09 | 76%                  |
|                                                                 | Over 50 years old                | 5       | 309    | 291 | -0.03 [-0.19, 0.14]                                 | 0%                         | P = 0.76 | 76%                  |
|                                                                 | Physical exercise frequency      | 7       | 428    | 386 | -0.27 [-0.58, 0.04]                                 |                            | P = 0.09 | 76%                  |
|                                                                 | Three days per week              | 7       | 398    | 368 | -0.15 [-                                            | 65%                        | P = 0.24 | 76%                  |

[illegible]



---

significance.

---

**Fig. S2** *Quality of life*

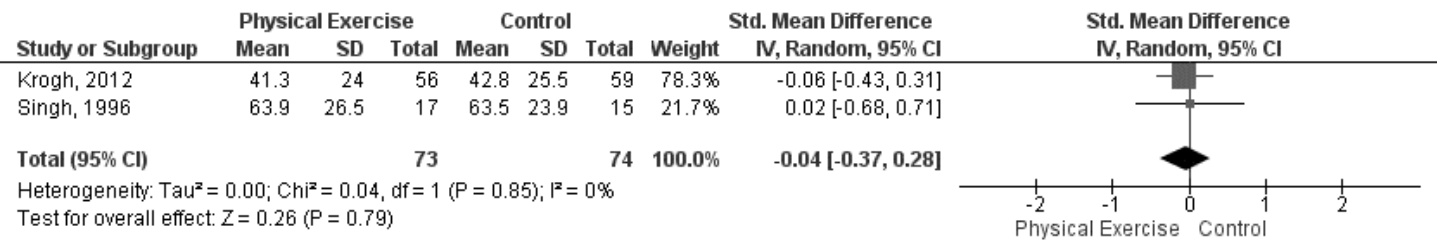

**Fig. S2** Analysis of the effect of physical exercise programs on Quality of life in adults with major depressive disorder compared with control.  $I^2$ : heterogeneity,  $p$  value  $<0.05$ , Standardized mean difference, Random effects model

**Table S5** *Summary of findings*

**Physical exercise compared to second-generation antidepressants, BME or no exercise interventions in adults with major depressive disorder who do not receive treatment (second-generation antidepressants or cognitive behavioral therapy)**

**Patient or population:** adults with major depressive disorder who do not receive treatment (second-generation antidepressants or cognitive behavioral therapy)

**Intervention:** physical exercise

**Comparison:** second-generation antidepressants, BME or no exercise interventions

| Outcomes                                                                                                    | Anticipated absolute effects* (95% CI)                                   |                                                              | Relative effect (95% CI) | № of participants (studies) | Certainty of the evidence (GRADE)   | Comments                                                                                                        |
|-------------------------------------------------------------------------------------------------------------|--------------------------------------------------------------------------|--------------------------------------------------------------|--------------------------|-----------------------------|-------------------------------------|-----------------------------------------------------------------------------------------------------------------|
|                                                                                                             | Risk second-generation antidepressants, BME or no exercise interventions | Risk with physical exercise                                  |                          |                             |                                     |                                                                                                                 |
| Depressive symptoms assessed with: Questionnaires (HAM-D, BDI, BDI-II) follow-up: range 8 weeks to 16 weeks | The mean depressive symptoms ranged from <b>6.29</b> a <b>23.3</b> score | SMD <b>0.27</b> score <b>fewer (0.58 fewer to 0.04 more)</b> | -                        | 814 (7 RCTs)                | ⊕○○○<br>Very low <sup>a,b,c,d</sup> | The physical exercise may reduce little to no effect on depressive symptoms, but the evidence is very uncertain |
| Adverse events assessed with: Common Terminology Criteria for adverse events                                | 105 per 1.000                                                            | <b>0 per 1.000 (0 to 0)</b>                                  | not estimable            | 812 (7 RCTs)                | ⊕⊕○○<br>Low <sup>a,d,e</sup>        | The evidence suggests that physical exercise does not increase adverse events                                   |
| Quality of life assessed with: Questionnaires (SF-36, WHQ-5)                                                | The mean quality of life ranged from <b>42.8</b> a <b>63.5</b> score     | SMD <b>1.14</b> score <b>fewer (9.28 fewer to 7 more)</b>    | -                        | 143 (2 RCTs)                | ⊕○○○<br>Very low <sup>c,d,f,g</sup> | The physical exercise may have little to no effect on quality of life, but the evidence is very uncertain       |
| Mortality - not reported                                                                                    | -                                                                        | -                                                            | -                        | -                           | -                                   |                                                                                                                 |

\***The risk in the intervention group** (and its 95% confidence interval) is based on the assumed risk in the comparison group and the **relative effect** of the intervention (and its 95% CI). **CI:** confidence interval; **MD:** mean difference

**GRADE Working Group grades of evidence.**

**High certainty:** we are very confident that the true effect lies close to that of the estimate of the effect.

**Moderate certainty:** we are moderately confident in the effect estimate: the true effect is likely to be close to the estimate of the effect, but there is a possibility that it is substantially different.

**Low certainty:** our confidence in the effect estimate is limited: the true effect may be substantially different from the estimate of the effect.

**Very low certainty:** we have very little confidence in the effect estimate: the true effect is likely to be substantially different from the estimate of effect.
